# Supplementary material for: Assessing Diatom Community Dynamics in a Recovering Agricultural Stream in Middle Georgia, USA
Source: MDPI journal article supplement (doi:10.3390/phycology3020019), 2023-05-19
Supplement: s1 [file s1]

# Supplementary Materials

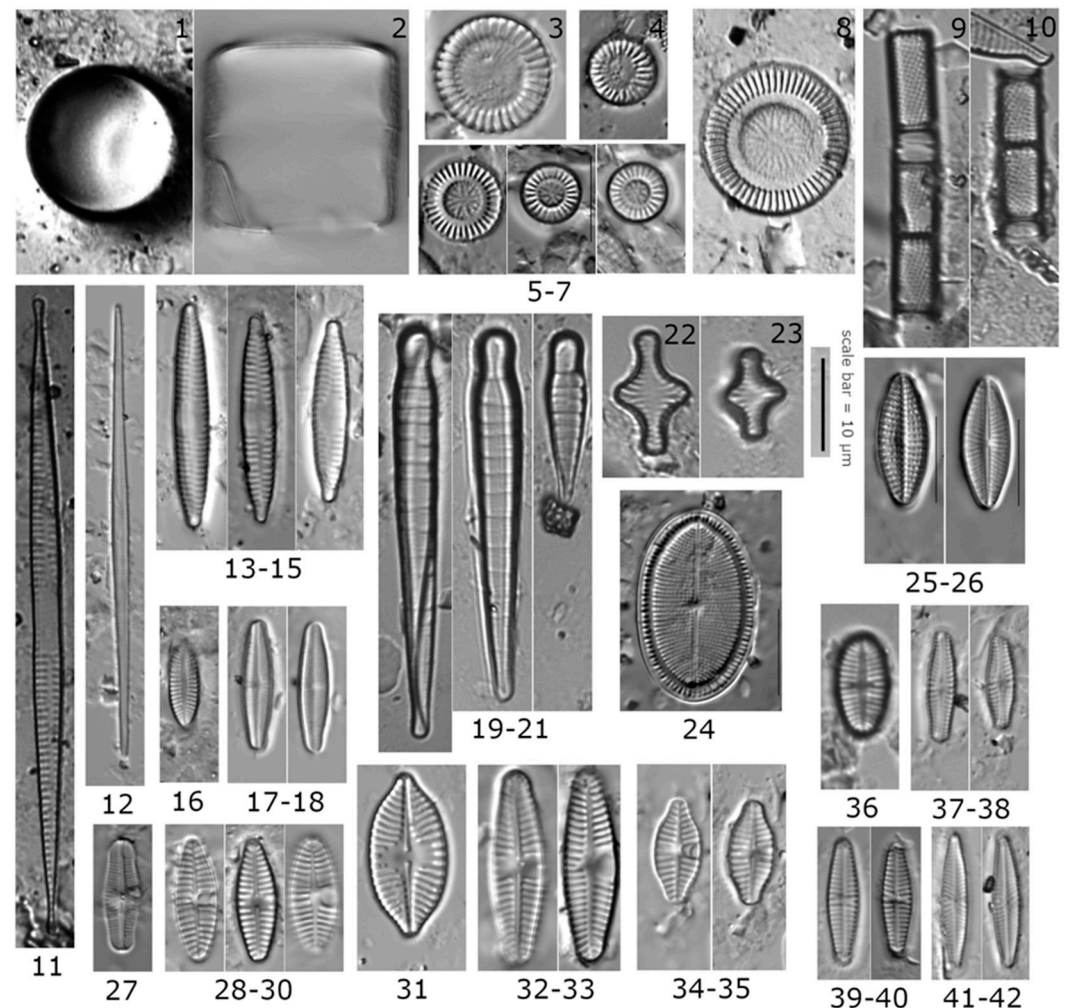

**Plate S1.** Light micrographs of araphid, monoraphid, and small naviculoid taxa. Figs 1-2. *Melosira varians* C.Agardh; Fig 3. *Cyclotella meneghiniana* Kützing; Fig 4. Centric diatom; Figs 5-7. *Discostella stelligera* (Cleve & Grunow) Houk & Klee; Fig 8. *Discostella* sp. 2; Figs 9-10. *Aulacoseira ambigua* (Grunow) Simonsen; Fig 11. *Fragilaria tenera* (W.Smith) Lange-Bertalot; Fig 12. *F. sepes* Ehrenberg. Figs 13-15. *F. vaucheriae* (Kützing) J.B.Petersen; Fig 16. *Achnanthisdium subhudsonis* var. *krauseli* (Cholnoky) Cantonati & Lange-Bertalot; Figs 17-18. *A. minutissimum* (Kützing) Czarnecki; Figs 19-21. *Meridion constrictum* Ralfs; Figs 22-23. *Staurosira constuens* Ehrenberg; Fig 24. *Cocconeis placentula* Ehrenberg; Figs 25-26. *Karayevia clevei* (Grunow) Bukhtiyarova. Fig 27. *Achnanthisdium reimeri* (Camburn) Ponader & Potapova; Figs 28-30. *Planothidium frequentissimum* (Lange-Bertalot) Lange-Bertalot; Fig 31. *P. delicatulum* (Kützing) Round & Bukhtiyarova; Figs 32-33. *P. lanceolatum* (Brébisson ex Kützing) Lange-Bertalot; Figs 34-35. *Planothidium* cf. *rostratum*; Fig 36. *Psammothidium chlidanos* (M.H.Hohn & Hellerman) Lange-Bertalot; Figs 37-38. *Chamaepinnularia soehrensensis* var. *musicola* (J.B.Petersen) Lange-Bertalot & Krammer; Figs 39-40. *Hippodonta pseudacceptata* (H.Kobayasi) Lange-Bertalot, Metzeltin & Witkowski; Figs 41-42. *Navicula vilaplani* (Lange-Bertalot & Sabater) Lange-Bertalot & Sabater. Scale bar = 10 µm.

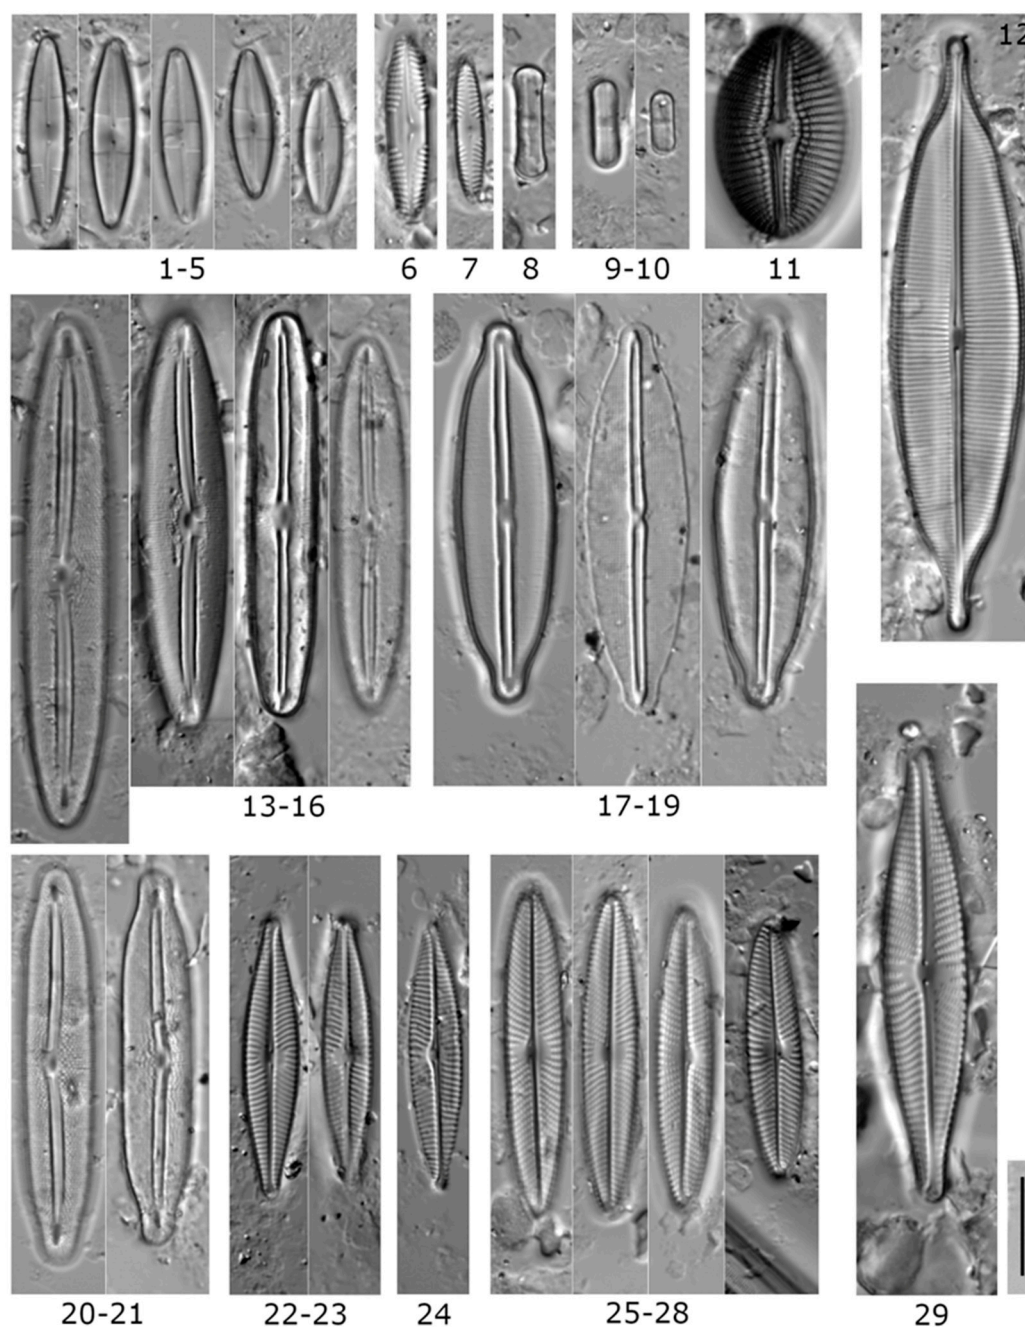

**Plate S2.** Light micrographs of symmetric biraphid taxa. Figs 1-5. *Caloneis hyalina* Hustedt; Fig 6. *Caloneis* cf. *bacillum* (Grunow) Cleve; Fig 7. *Pinnularia* cf. *obscura* Krasske; Fig 8. *Humidophila paracontenta* (Lange-Bertalot & Werum) R.L.Lowe & al.; Figs 9-10. *H. contenta* (Grunow) R.L.Lowe & al.; Fig 11. *Diploneis smithii* (Brébisson) Cleve; Fig 12. *Craticula ambigua* (Ehrenberg) D.G.Mann; Figs 13-16. *Frustulia vulgaris* (Thwaites) De Toni; Figs 17-19. *F. crassinervia* (Brébisson ex W.Smith) Lange-Bertalot & Krammer; Figs 20-21. *F. capitata* C.L.Graeff & Kociolek; Figs 22-23. *Navicula cryptocephala* Kützinger; Fig 24. *N.* cf. *cryptocephala*; Figs 25-28. *N. escambia* (R.M.Patrick) Metzeltin & Lange-Bertalot; Fig 28. *N. rhynchocephala* Kützinger. Scale bar = 10  $\mu$ m.

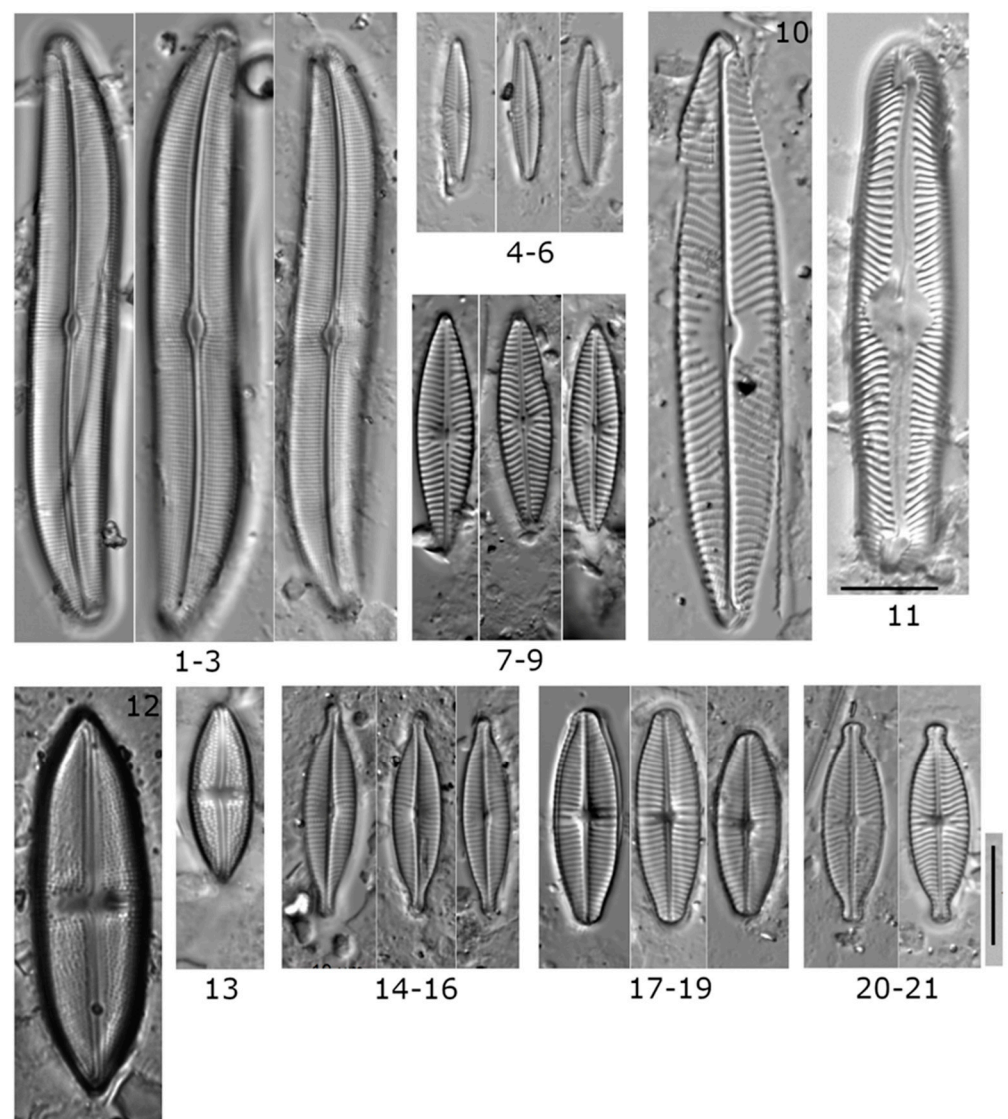

**Plate S3.** Light micrographs of symmetric biraphid taxa. Figs 1-3. *Gyrosigma obtusatum* (Sullivant & Wormley) C.S.Boyer; Figs 4-6. *Navicula vilaplanii* (Lange-Bertalot & Sabater) Lange-Bertalot & Sabater; Figs 7-9. *N. cryptotenella* Lange-Bertalot; Fig 10. *N. viridulacalcis* Lange-Bertalot; Fig 11. *Pinnularia mesogongyla* Ehrenberg; Fig 12. *Luticola minor* (R.M.Patrick) A. Mayama; Fig 13. *L. goepportiana* (Bleisch) D.G.Mann ex J.Rarick, S.Wu, S.S.Lee & Edlund; Figs 14-16. *Navicula gregaria* Donkin; Figs 17-19. *Geissleria lateropunctata* (Wallace) Potapova & Winter; Figs 20-21. *G. decussis* (Østrup) Lange-Bertalot & Metzeltin. Scale bar = 10 µm.



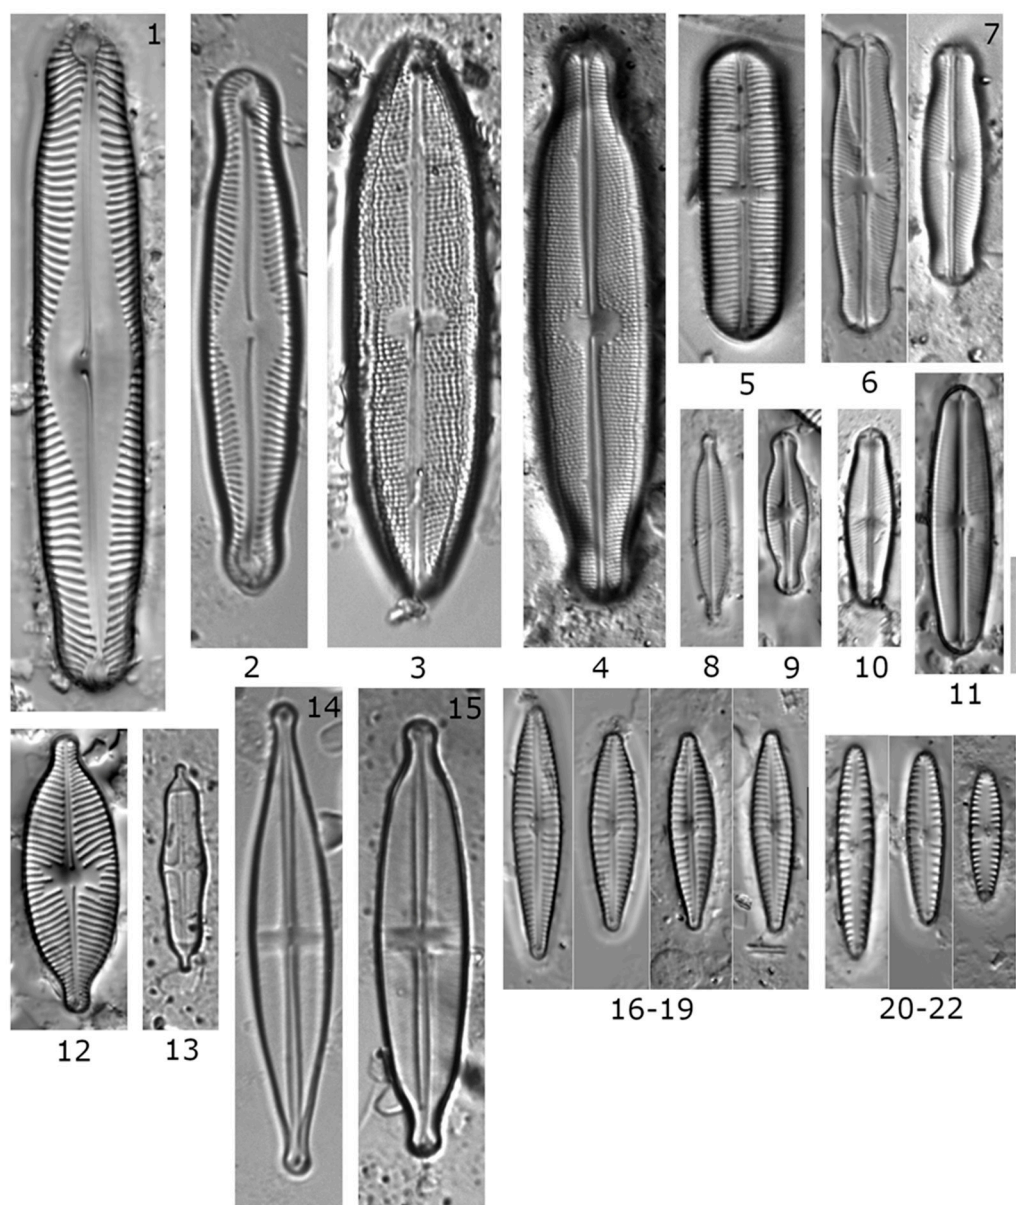

**Plate S4.** Light micrographs of symmetric and asymmetric biraphid taxa. Fig 1. *Pinnularia* sp. 8; Fig 2. *Pinnularia* sp.1; Fig 3. *Neidium* sp. 3; Fig 4. *Neidium* sp. 1; Fig 5. *Sellaphora* sp. 3; Figs 6-7. *Sellaphora pupula* (Kützing) Mereschkovsky; Fig 8. *Navicula longicephala* Hustedt; Fig 9. *Sellaphora hustedtii* (Krasske) Lange-Bertalot & Werum 2004. Fig 10. *Sellaphora* sp.1; Fig 11. *Sellaphora* sp.5; Fig 12. *Placoneis symmetrica* (Hustedt) Lange-Bertalot; Fig 13. *Stauroneis smithii* Grunow; Fig 14. *Stauroneis* sp.2; Fig 15. *S. kriegeri* R.M.Patrick; Figs 16-19. *Gomphonema parvulum* (Kützing) Kützing; Figs 20-22. *G. kobayasii* Kociolek & J.C.Kingston 1999. Scale bar = 10  $\mu$ m.

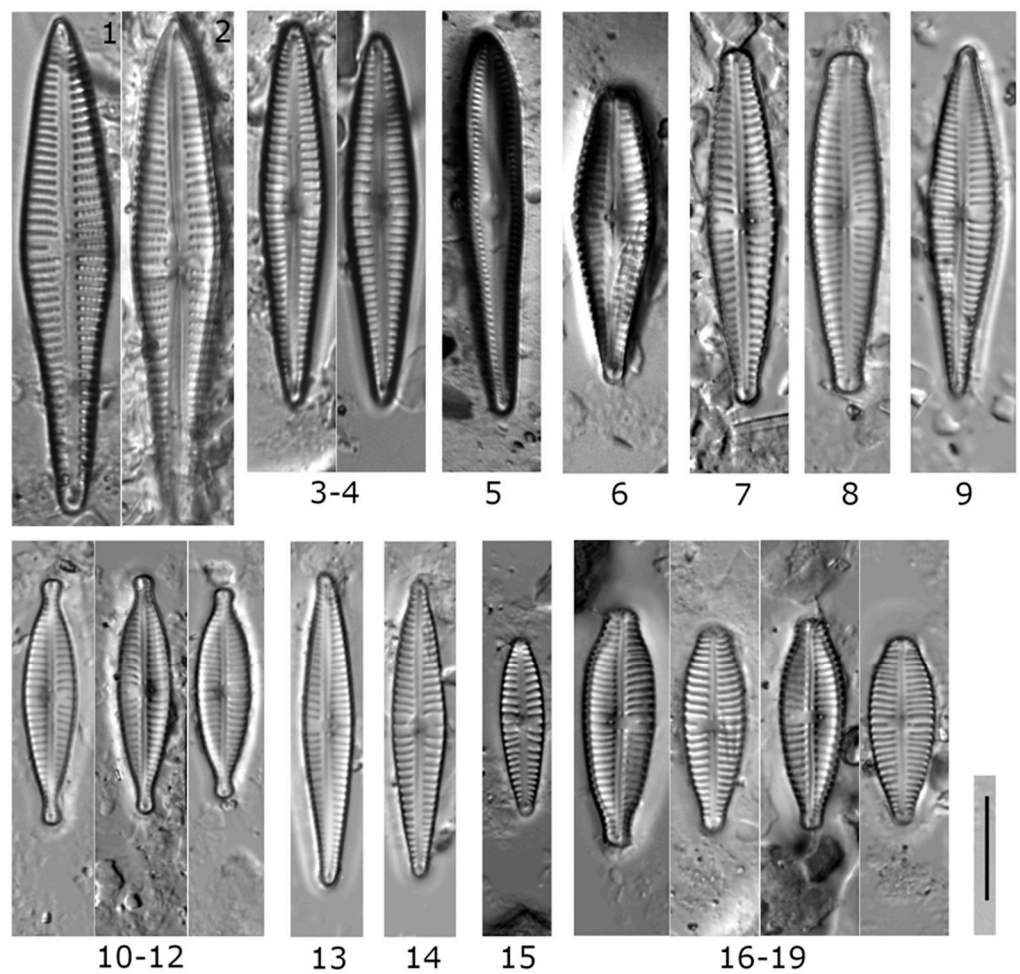

**Plate S5.** Light micrographs of gomphonemoid taxa. Figs 1-2. *Gomphonema* cf. *insigne* W. Gregory; Figs 3-4. *Gomphonema* sp. 1; Fig 5. *G.* cf. *brasiliense* Grunow; Fig 6. *Gomphonema* sp. 20. Fig 7. *Gomphonema* cf. *extentum* E.Reichardt & Lange-Bertalot; Fig 8. *Gomphonema* sp. 13; Fig 9. *Gomphonema* sp. 16; Figs 10-12. *G. lagenula* Kützing; Fig 13-14. *Gomphonema* cf. *lippertii* E.Reichardt & Lange-Bertalot; Fig 15. *G. innocens* E.Reichardt; Figs 16-19. *G. micropus* Kützing. Scale bar = 10  $\mu$ m.

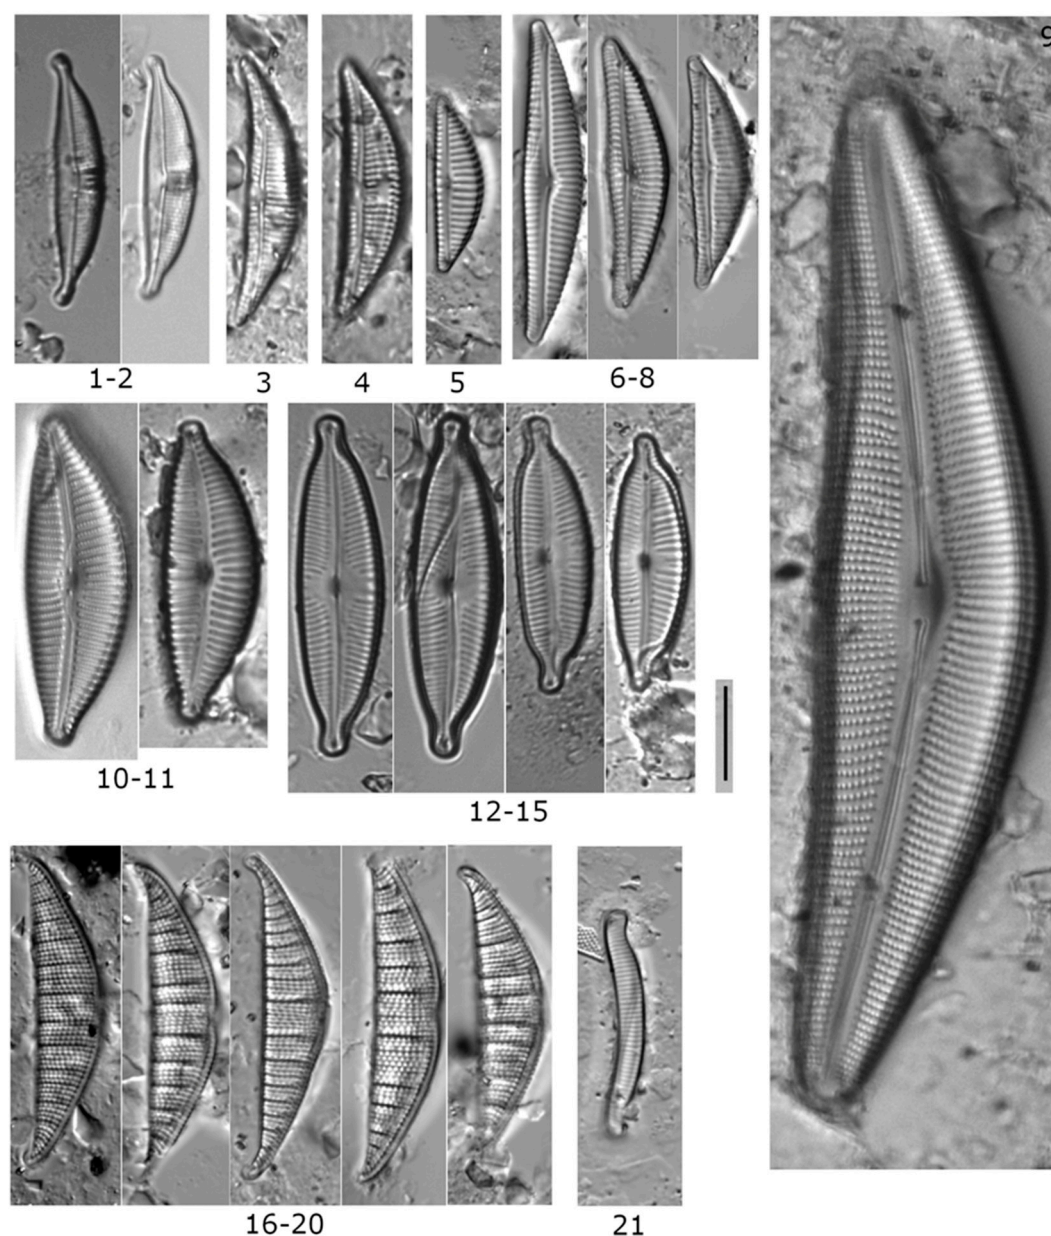

**Plate S6.** Light micrographs of cymbelloid, epithemoid, and eunotioid taxa. Figs 1-2. *Amphora bicapitata* M.H.Hohn & J.Hellerman; Fig 3. *A. ovalis* (Kützing) Kützing; Fig 4. *A. ovalis* var. *libyca* (Ehrenberg) Cleve; Fig 5. *Encyonema* cf. *minutum* (Hilse) D.G.Mann; Figs 6-8. *E. silesiacum* (Bleisch) D.G.Mann; Fig 9. *Cymbella aspera* (Ehrenberg) Cleve; Figs 10-11. *C. tumidula* Grunow; Figs 12-15. *Cymboplectra naviculiformis* (Auerswald ex Heiberg) Krammer; Figs 16-20. *Rhopalodia gibberula* (Ehrenberg) O.Müller; Fig 21. *Eunotia exigua* (Brébisson ex Kützing) Rabenhorst. Scale bar = 10  $\mu$ m.



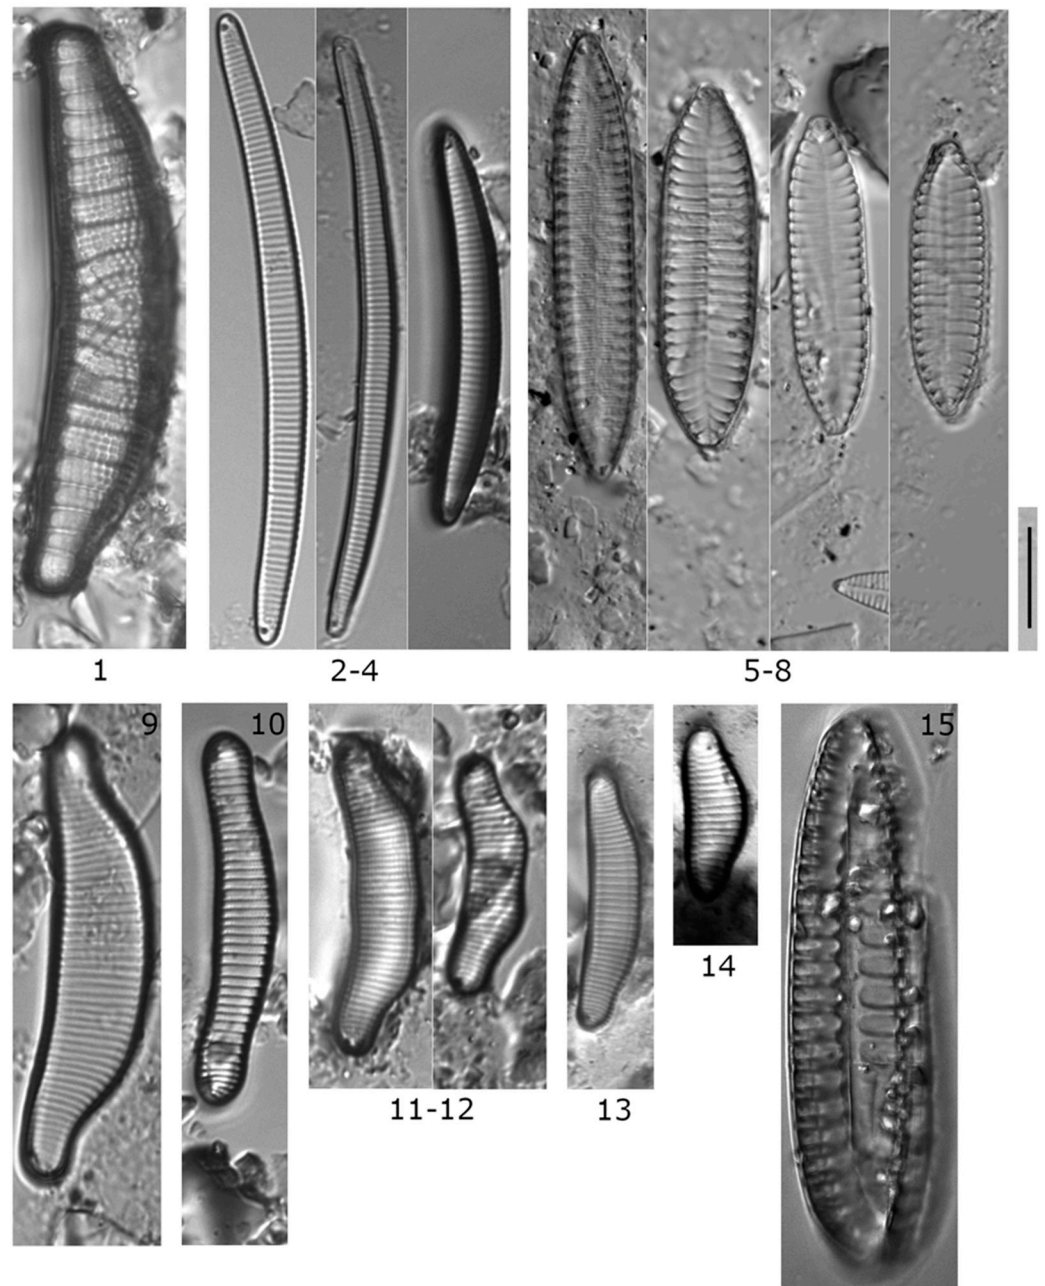

**Plate S7.** Light micrographs of epithemioid, eunotioid, and surirelloid taxa, Fig 1. *Epithemia adnata* (Kützing) Brébisson. Figs 2-4. *Eunotia bilunaris* (Ehrenberg) Schaarschmidt; Figs 5-8. *Surirella angusta* Kützing; Fig 9. *Eunotia cf. sudetica*; Fig 10. *E. cf. metamonodon* Lange-Bertalot; Figs 11-12. *E. pectinalis* (Kützing) Rabenhorst; Fig 13. *Eunotia soleirolii* (Kützing) Rabenhorst; Fig 14. *Eunotia* sp. 2; Fig 15. *Surirella* sp. 2. Scale bar = 10  $\mu$ m.

**Table S1.** Chemical values detected in samples. Values = mean  $\pm$  standard error. N = 3 for all. \* below detectable limits

| Chemical | Tobler Creek<br>February 2021 | Tobler Creek<br>April 2021 | Murder Creek<br>February 2021 | Murder Creek<br>April 2021 |
|----------|-------------------------------|----------------------------|-------------------------------|----------------------------|
| hardness | 19.75 $\pm$ 0.26              | 20.55 $\pm$ 0.26           | 23.63 $\pm$ 0.13              | 26.84 $\pm$ 0.04           |
| Al (ppm) | 0.61 $\pm$ 0.03               | 0.82 $\pm$ 0.13            | 0.61 $\pm$ 0.01               | 0.23 $\pm$ 0.01            |
| B (ppm)  | <0.01*                        | <0.01*                     | <0.01*                        | <0.01*                     |
| Ca (ppm) | 4.09 $\pm$ 0.07               | 4.33 $\pm$ 0.09            | 5.58 $\pm$ 0.03               | 6.31 $\pm$ 0.01            |
| Cr (ppm) | <0.01*                        | <0.01*                     | <0.01*                        | <0.01*                     |
| Cu (ppm) | <0.05*                        | <0.05*                     | <0.05*                        | <0.05*                     |
| Fe (ppm) | 1.02 $\pm$ 0.17               | 0.63 $\pm$ 0.06            | 1.07 $\pm$ 0.02               | 0.57 $\pm$ 0.04            |
| K (ppm)  | 0.95 $\pm$ 0.12               | 1.48 $\pm$ 0.10            | 1.91 $\pm$ 0.02               | 2.00 $\pm$ 0.01            |
| Mg (ppm) | 2.31 $\pm$ 0.02               | 2.37 $\pm$ 0.02            | 2.36 $\pm$ 0.02               | 2.69 $\pm$ 0.004           |
| Mn (ppm) | 0.13 $\pm$ 0.04               | 0.08 $\pm$ 0.002           | 0.06 $\pm$ 0.001              | <0.05*                     |
| Mo (ppm) | <0.01*                        | <0.01*                     | <0.01*                        | <0.01*                     |
| Na (ppm) | 6.61 $\pm$ 0.05               | 4.60 $\pm$ 0.09            | 4.72 $\pm$ 0.03               | 4.80 $\pm$ 0.02            |
| Ni (ppm) | <0.01*                        | <0.01*                     | <0.01*                        | <0.01*                     |
| Si (ppm) | 5.00 $\pm$ 0.07               | 6.13 $\pm$ 0.17            | 9.39 $\pm$ 0.05               | 9.11 $\pm$ 0.01            |
| Zn (ppm) | <0.05*                        | <0.05*                     | <0.05*                        | <0.05*                     |

**Disclaimer/Publisher's Note:** The statements, opinions and data contained in all publications are solely those of the individual author(s) and contributor(s) and not of MDPI and/or the editor(s). MDPI and/or the editor(s) disclaim responsibility for any injury to people or property resulting from any ideas, methods, instructions or products referred to in the content.
